# Supplementary material for: Transcriptome Analysis Reveals Key Genes and Pathways Associated with the Regulation of Flowering Time in Cabbage (Brassica oleracea L. var. capitata)
Source: MDPI journal article supplement (doi:10.3390/plants12193413), 2023-09-28
Supplement: s1 [file s1]

## Supplementary Information

**Figure S1.** Field investigation of flowering time in F<sub>2</sub> population.

**Figure S2.** Distribution of the expression levels of all genes in the twelve leaf samples. (a) The FPKM plotbox distribution of C491\_VS\_B602. (b) The FPKM density distribution of C491\_VS\_B602. (c) The FPKM plotbox distribution of F2-B\_VS\_F2-NB. (d) The FPKM density distribution of F2-B\_VS\_F2-NB.

**Figure S3.** Volcano plots of differentially expressed genes (DEGs) for each comparison in leaves of early- and late-bolting cabbage. (a) Volcano plots of differentially expressed genes (DEGs) for C491\_VS\_B602. (b) Volcano plots of differentially expressed genes (DEGs) for F2-B\_VS\_F2-NB.

**Figure S4.** Validate the expression patterns of *BoSEP2-1* and *BoSEP2-2* in other early-flowering (NCF8-1 and HC101-1) and late-flowering (NCF11-1 and HB9-1) materials using alternative samples.

**Table S1.** Overview of the transcriptome sequencing dataset.

**Table S2.** Go terms of 3748 DEGs common in the C491\_VS\_B602 and F2-B\_VS\_F2-NB comparison groups.

**Table S3.** KEGG pathways of 3748 DEGs common in the C491\_VS\_B602 and F2-B\_VS\_F2-NB comparison groups.

**Table S4.** Cabbage homologs of flowering-time genes.

**Table S5.** Information on 25 DEGs related to flowering time in C491\_VS\_B602 and F2-B\_VS\_F2-NB.

**Table S6.** Sequences of primer used for qRT-PCR in this study.
