# Supplementary material for: Transcriptome Analysis Reveals Key Genes and Pathways Associated with the Regulation of Flowering Time in Cabbage (Brassica oleracea L. var. capitata)
Source: Plants (Basel). 2023 Sep 28;12(19):3413. doi: 10.3390/plants12193413 (PMC10574337; doi:10.3390/plants12193413)
Supplement: Supplementary file 1 [file plants-12-03413-s001.zip]

Archive with 11 entries (11 files):
- Figure S1.jpg
- Figure S2.jpg
- Figure S3.jpg
- Figure S4.jpg
- Supplementary Materials.pdf
- Table S1.xlsx
- Table S2.xlsx
- Table S3.xlsx
- Table S4.xlsx
- Table S5.xlsx
- Table S6.xlsx
