# Supplementary material for: Transcriptome Analysis Reveals Key Genes and Pathways Associated with the Regulation of Flowering Time in Cabbage (Brassica oleracea L. var. capitata)
Source: Plants (Basel). 2023 Sep 28;12(19):3413. doi: 10.3390/plants12193413 (PMC10574337; doi:10.3390/plants12193413)
Supplement: Supplementary file 1 [file plants-12-03413-s001.zip › Table S1.xlsx]

## Sheet: Sheet1
Table S1:	Overview of the transcriptome sequencing dataset.
Samples	Clean reads	Clean bases	Q30(%)	Total mapped reads (%)	Uniquely mapped reads (%)	Multiple mapped reads (%)
B602-1	23073707	6896678102	93.85	89.53	87.04	2.49
B602-2	19969140	5953858802	94.02	89.41	86.87	2.54
B602-3	20891479	6244778172	94.36	89.55	87.1	2.45
C491-1	32179314	9601750144	94.46	89.41	89.41	3.1
C491-2	27372002	8169589738	94.78	90.04	90.04	3.21
C491-3	29385394	8766716058	94.88	89.49	89.49	2.74
F2-NB1	41513584	5851119713	95.04	79.69	74.33	5.36
F2-NB2	39802064	5611210558	94.61	73	62.25	8.75
F2-NB3	44465618	6137251152	94.91	78.42	73.5	4.92
F2-B1	52077498	7509132558	94.81	81.19	76.1	5.08
F2-B2	48183706	6961630666	94.43	81.28	76.26	5.01
F2-B3	44440332	6381098172	94.78	80.21	75.44	4.78
