# Supplementary material for: Transcriptome Analysis Reveals Key Genes and Pathways Associated with the Regulation of Flowering Time in Cabbage (Brassica oleracea L. var. capitata)
Source: Plants (Basel). 2023 Sep 28;12(19):3413. doi: 10.3390/plants12193413 (PMC10574337; doi:10.3390/plants12193413)
Supplement: Supplementary file 1 [file plants-12-03413-s001.zip › Table S2.xlsx]

## Sheet: upregulated
GO Term	Gene Number	Ratio	P-value	BP/MF/CC
response to stimulus	736	0.0791058	5.71e-66	BP
response to chemical	471	0.093212	1.54e-52	BP
response to stress	460	0.0870223	3.18e-43	BP
response to oxygen-containing compound	324	0.104956	5.46e-43	BP
response to organic substance	346	0.098688	4.9e-41	BP
response to abiotic stimulus	368	0.0894507	2.63e-35	BP
response to external stimulus	291	0.0980789	2.65e-33	BP
cellular response to chemical stimulus	228	0.111383	1.18e-32	BP
response to endogenous stimulus	259	0.101888	1.26e-31	BP
response to hormone	255	0.101675	5.86e-31	BP
cellular response to stimulus	337	0.0870127	1.33e-29	BP
response to other organism	245	0.0991501	2.98e-28	BP
response to external biotic stimulus	245	0.0991501	2.98e-28	BP
biological process involved in interspecies interaction between organisms	246	0.0989144	3.81e-28	BP
response to biotic stimulus	245	0.09907	4.93e-28	BP
cellular response to organic substance	177	0.114194	2.92e-26	BP
response to lipid	203	0.10491	5.91e-26	BP
response to inorganic substance	211	0.0999526	1.6e-24	BP
biological regulation	555	0.0674936	3.41e-24	BP
cellular process	865	0.0582413	9.21e-24	BP
cell periphery	300	0.0837755	1.54e-23	CC
response to osmotic stress	121	0.135347	1.58e-23	BP
plasma membrane	268	0.0870978	4.4e-23	CC
response to acid chemical	134	0.121157	7.53e-22	BP
signaling	227	0.0917542	7.86e-22	BP
cellular response to endogenous stimulus	140	0.117253	8.91e-22	BP
cell communication	240	0.0892857	9.04e-22	BP
signal transduction	222	0.092078	1.24e-21	BP
response to water deprivation	125	0.125	1.33e-21	BP
cellular response to oxygen-containing compound	135	0.118421	3.24e-21	BP
cellular response to hormone stimulus	136	0.117444	3.38e-21	BP
response to water	129	0.120224	7.15e-21	BP
response to salt stress	93	0.149518	7.7e-21	BP
defense response	220	0.090127	2.29e-20	BP
regulation of biological process	503	0.0669061	2.33e-20	BP
response to alcohol	136	0.113903	5.32e-20	BP
defense response to other organism	196	0.0926276	3.24e-19	BP
regulation of cellular process	430	0.069299	3.35e-19	BP
response to abscisic acid	124	0.115564	6.66e-19	BP
vacuole	122	0.11597	1.07e-18	CC
plant-type vacuole	102	0.12798	3.29e-18	CC
membrane	353	0.0701789	6.68e-16	CC
response to bacterium	128	0.10306	7.95e-16	BP
defense response to bacterium	110	0.1069	1.45e-14	BP
hormone-mediated signaling pathway	102	0.109677	2.81e-14	BP
binding	610	0.0590971	9.03e-14	MF
protein serine/threonine kinase activity	86	0.112713	8.36e-13	MF
regulation of response to stimulus	124	0.0928144	2.08e-12	BP
catabolic process	176	0.0809568	2.86e-12	BP
response to organic cyclic compound	88	0.107711	4.77e-12	BP
response to radiation	167	0.0816626	5.08e-12	BP
response to light stimulus	164	0.0818772	6.85e-12	BP
cellular catabolic process	144	0.0856124	8e-12	BP
response to fungus	97	0.0974874	5.4e-11	BP
kinase activity	116	0.0895062	1.03e-10	MF
defense response to fungus	76	0.108262	1.17e-10	BP
transferase activity	244	0.069914	1.57e-10	MF
cellular response to lipid	63	0.119545	1.63e-10	BP
response to wounding	82	0.100613	4.83e-10	BP
protein kinase activity	97	0.0931796	5.6e-10	MF
protein binding	359	0.0627074	6.81e-10	MF
protein phosphorylation	98	0.0927152	7.25e-10	BP
metabolic process	610	0.0563458	9.34e-10	BP
phosphorylation	104	0.0889649	1.28e-09	BP
DNA-binding transcription factor activity	135	0.0810324	1.54e-09	MF
transferase activity, transferring phosphorus-containing groups	125	0.0829463	1.77e-09	MF
cellular metabolic process	511	0.0578774	2.46e-09	BP
catalytic activity, acting on a protein	188	0.0721966	3.59e-09	MF
ion binding	199	0.07097	3.67e-09	MF
response to temperature stimulus	83	0.095843	3.99e-09	BP
phosphotransferase activity, alcohol group as acceptor	104	0.0867389	4.66e-09	MF
phosphate-containing compound metabolic process	145	0.0771687	5.86e-09	BP
oxoacid metabolic process	149	0.0762929	7.6e-09	BP
response to organonitrogen compound	67	0.103395	8.99e-09	BP
organic substance metabolic process	554	0.0564903	1.03e-08	BP
organic acid metabolic process	156	0.0747126	1.14e-08	BP
organic substance catabolic process	142	0.0766739	1.27e-08	BP
phosphorus metabolic process	146	0.0758836	1.6e-08	BP
transcription regulator activity	138	0.0757409	5.03e-08	MF
response to oxidative stress	62	0.101142	6.1e-08	BP
mitochondrion	137	0.0308698	1.31e-07	CC
protein modification process	183	0.0688229	1.41e-07	BP
cellular anatomical entity	1187	0.0484016	1.55e-07	CC
transporter activity	107	0.0799104	1.66e-07	MF
anion binding	103	0.0805317	1.89e-07	MF
regulation of signal transduction	47	0.110849	2e-07	BP
localization	181	0.0687168	2.07e-07	BP
regulation of response to stress	78	0.0886364	2.17e-07	BP
response to decreased oxygen levels	40	0.120846	2.53e-07	BP
response to oxygen levels	40	0.12012	2.81e-07	BP
response to nitrogen compound	72	0.0911392	3e-07	BP
transmembrane transporter activity	103	0.0795981	3.16e-07	MF
response to heat	37	0.123746	3.45e-07	BP
catalytic activity	472	0.0565405	3.69e-07	MF
regulation of signaling	47	0.108545	4.17e-07	BP
cellular response to alcohol	31	0.136564	4.63e-07	BP
cellular response to abscisic acid stimulus	31	0.136564	4.63e-07	BP
organonitrogen compound metabolic process	326	0.0601254	4.68e-07	BP
regulation of defense response	68	0.0913978	5.38e-07	BP
regulation of cell communication	47	0.105856	6.83e-07	BP
response to light intensity	42	0.112601	7.05e-07	BP
nucleus	578	0.0545334	7.11e-07	CC
establishment of localization	159	0.0688908	1.02e-06	BP
small molecule metabolic process	189	0.0661533	1.13e-06	BP
abscisic acid-activated signaling pathway	24	0.152866	1.56e-06	BP
transport	155	0.0686448	1.75e-06	BP
response to hypoxia	37	0.114551	1.92e-06	BP
anatomical structure maturation	38	0.114114	2.34e-06	BP
response to salicylic acid	45	0.102273	3.07e-06	BP
transcription cis-regulatory region binding	81	0.0816532	3.08e-06	MF
transcription regulatory region nucleic acid binding	81	0.0816532	3.08e-06	MF
carbohydrate derivative binding	73	0.0844907	3.16e-06	MF
cellular response to hypoxia	30	0.125523	3.33e-06	BP
cellular response to decreased oxygen levels	30	0.124481	3.87e-06	BP
small molecule binding	102	0.0752768	4.02e-06	MF
cellular response to oxygen levels	30	0.123967	4.17e-06	BP
ribonucleotide binding	70	0.0845411	4.5e-06	MF
sequence-specific double-stranded DNA binding	81	0.0801187	5.48e-06	MF
macromolecule modification	194	0.0640264	6.24e-06	BP
response to jasmonic acid	55	0.0907591	7.86e-06	BP
nucleoside phosphate binding	87	0.0771277	8.63e-06	MF
nucleotide binding	87	0.0771277	8.63e-06	MF
response to fatty acid	55	0.0901639	8.66e-06	BP
catalytic activity, acting on a nucleic acid	12	0.0155642	8.75e-06	MF
developmental maturation	38	0.107042	9.04e-06	BP
inorganic molecular entity transmembrane transporter activity	52	0.0910683	1.14e-05	MF
lipid catabolic process	19	0.158333	1.2e-05	BP
cellular lipid catabolic process	18	0.165138	1.21e-05	BP
intracellular anatomical structure	1059	0.0490869	1.44e-05	CC
regulation of biological quality	88	0.0758621	1.52e-05	BP
regulation of RNA metabolic process	153	0.0661193	1.56e-05	BP
transmembrane transport	69	0.0817536	1.71e-05	BP
regulation of nucleobase-containing compound metabolic process	160	0.0653328	2.01e-05	BP
regulation of cellular biosynthetic process	165	0.0647821	2.25e-05	BP
regulation of DNA-templated transcription	145	0.0663919	2.38e-05	BP
regulation of nucleic acid-templated transcription	145	0.0663616	2.4e-05	BP
regulation of RNA biosynthetic process	145	0.0663009	2.42e-05	BP
protein autophosphorylation	23	0.130682	2.53e-05	BP
DNA metabolic process	6	0.0113636	2.55e-05	BP
cellular response to abiotic stimulus	29	0.114625	2.57e-05	BP
cellular response to environmental stimulus	29	0.114625	2.57e-05	BP
regulation of macromolecule biosynthetic process	154	0.0650888	3.01e-05	BP
regulation of stomatal movement	17	0.158879	3.26e-05	BP
sequence-specific DNA binding	93	0.0728269	3.62e-05	MF
cytosol	169	0.0638218	3.82e-05	CC
calcium ion binding	29	0.111111	4.03e-05	MF
carboxylic acid metabolic process	108	0.0702668	4.12e-05	BP
regulation of biosynthetic process	166	0.0637726	4.16e-05	BP
ion transport	49	0.0890909	4.57e-05	BP
ADP binding	22	0.128655	4.65e-05	MF
regulation of hormone levels	32	0.104918	4.71e-05	BP
purine nucleotide binding	65	0.0800493	5.26e-05	MF
organonitrogen compound catabolic process	81	0.0743802	5.96e-05	BP
immune system process	42	0.0921053	6.17e-05	BP
plant organ development	131	0.06643	6.73e-05	BP
metal ion transport	25	0.119617	6.85e-05	BP
identical protein binding	39	0.094431	6.96e-05	MF
endomembrane system	153	0.0640167	7.65e-05	CC
plastid thylakoid	5	0.0110865	7.81e-05	CC
response to reactive oxygen species	21	0.127273	7.88e-05	BP
regulation of primary metabolic process	181	0.0620713	7.92e-05	BP
response to oomycetes	16	0.152381	8.55e-05	BP
response to carbohydrate	22	0.122905	8.57e-05	BP
lipid metabolic process	92	0.0714841	8.91e-05	BP
purine ribonucleotide binding	63	0.0788486	9.55e-05	MF
protein metabolic process	226	0.0594737	9.82e-05	BP
cytoplasmic vesicle	59	0.0802721	0.000102	CC
intracellular vesicle	59	0.0800543	0.000105	CC
organelle inner membrane	2	0.00617284	0.000105	CC
double-stranded DNA binding	83	0.0729991	0.000109	MF
chloroplast thylakoid	5	0.011236	0.000109	CC
cation transport	31	0.103679	0.000111	BP
cell junction	68	0.0765766	0.000111	CC
anchoring junction	68	0.0765766	0.000111	CC
symplast	68	0.0765766	0.000111	CC
cell-cell junction	68	0.0765766	0.000111	CC
plasmodesma	68	0.0765766	0.000111	CC
organic cyclic compound binding	294	0.0570874	0.000116	MF
cell cycle process	9	0.0151771	0.000116	BP
trichoblast maturation	19	0.131034	0.00012	BP
root hair cell differentiation	19	0.131034	0.00012	BP
inorganic ion transmembrane transport	25	0.112108	0.000125	BP
monocarboxylic acid metabolic process	54	0.0824427	0.000125	BP
plastid membrane	6	0.0123967	0.000129	CC
cell maturation	19	0.130137	0.00013	BP
detection of stimulus	12	0.184615	0.000134	BP
auxin transport	15	0.153061	0.000135	BP
organelle envelope	32	0.0249415	0.000148	CC
envelope	32	0.0249415	0.000148	CC
root epidermal cell differentiation	21	0.12069	0.000154	BP
adenyl nucleotide binding	55	0.0808824	0.000166	MF
root hair cell development	16	0.142857	0.000167	BP
hormone transport	15	0.148515	0.000181	BP
response to nutrient levels	28	0.102941	0.000188	BP
ubiquitin-protein transferase activity	42	0.0882353	0.000199	MF
heterocyclic compound binding	290	0.0567515	0.0002	MF
intracellular membrane-bounded organelle	967	0.0492287	0.000207	CC
organelle lumen	28	0.0242634	0.000211	CC
membrane-enclosed lumen	28	0.0242634	0.000211	CC
intracellular organelle lumen	28	0.0242634	0.000211	CC
adenyl ribonucleotide binding	54	0.0807175	0.000213	MF
cellular response to organic cyclic compound	27	0.104247	0.000216	BP
peroxisome	32	0.0981595	0.000217	CC
microbody	32	0.0981595	0.000217	CC
response to red or far red light	35	0.0933333	0.000222	BP
trichoblast differentiation	19	0.124183	0.000225	BP
primary metabolic process	440	0.0537175	0.000243	BP
auxin polar transport	12	0.171429	0.000246	BP
heat acclimation	12	0.171429	0.000246	BP
ubiquitin-like protein transferase activity	42	0.0858896	0.000259	MF
response to chitin	30	0.0974026	0.000274	BP
nucleobase-containing compound metabolic process	70	0.0307828	0.000284	BP
regulation of cellular metabolic process	190	0.059918	0.00029	BP
membrane-bounded organelle	968	0.0491371	0.000293	CC
response to cold	41	0.0866808	0.000294	BP
cytoplasmic stress granule	8	0.25	0.000306	CC
Golgi apparatus	83	0.0703986	0.000327	CC
inorganic cation transmembrane transporter activity	36	0.0906801	0.000329	MF
structural molecule activity	7	0.0145228	0.00034	MF
cellular response to DNA damage stimulus	4	0.0106667	0.000346	BP
response to extracellular stimulus	31	0.095679	0.000349	BP
immune response	22	0.110553	0.00038	BP
active ion transmembrane transporter activity	25	0.104603	0.000381	MF
regulation of gene expression	170	0.0608229	0.000386	BP
ion transmembrane transporter activity	52	0.0790274	0.000393	MF
structural constituent of ribosome	3	0.00909091	0.000395	MF
response to indolebutyric acid	4	0.8	0.000397	BP
regulation of ion transport	9	0.209302	0.000408	BP
cellular response to light stimulus	18	0.121622	0.000408	BP
monocarboxylic acid catabolic process	11	0.171875	0.000432	BP
meiotic cell cycle process	2	0.00694444	0.000433	BP
inner mitochondrial membrane protein complex	0	0	0.000451	CC
regulation of nitrogen compound metabolic process	173	0.0602998	0.000453	BP
fatty acid catabolic process	9	0.204545	0.000473	BP
leaf development	39	0.0864745	0.000494	BP
thylakoid	9	0.0164534	0.000504	CC
import across plasma membrane	8	0.228571	0.000513	BP
cellular response to stress	84	0.0691358	0.000515	BP
ribosome	5	0.0125945	0.00054	CC
ribosomal subunit	3	0.00943396	0.00055	CC
nucleic acid metabolic process	56	0.0298507	0.000556	BP
import into cell	8	0.222222	0.000603	BP
response to mannitol	6	0.315789	0.000626	BP
auxin transmembrane transporter activity	6	0.315789	0.000626	MF
regulation of auxin mediated signaling pathway	9	0.195652	0.000627	BP
plastid thylakoid membrane	4	0.0113314	0.000657	CC
response to auxin	34	0.0883117	0.000682	BP
cation binding	109	0.0647653	0.000684	MF
protein-containing complex	105	0.0339367	0.000715	CC
photosynthetic membrane	5	0.0129534	0.000739	CC
non-membrane-bounded organelle	50	0.0293772	0.000744	CC
intracellular non-membrane-bounded organelle	50	0.0293772	0.000744	CC
regulation of metabolic process	225	0.0573833	0.000791	BP
intracellular organelle	971	0.0488775	0.000795	CC
regulation of response to alcohol	16	0.122137	0.000801	BP
regulation of cellular response to alcohol	16	0.122137	0.000801	BP
regulation of abscisic acid-activated signaling pathway	16	0.122137	0.000801	BP
fatty acid beta-oxidation	8	0.210526	0.000821	BP
mitochondrial protein-containing complex	2	0.00746269	0.000861	CC
vesicle	61	0.0733173	0.000862	CC
ion transmembrane transport	28	0.0945946	0.000878	BP
regulation of macromolecule metabolic process	190	0.0585516	0.000889	BP
chloroplast thylakoid membrane	4	0.0115942	0.000912	CC
sucrose metabolic process	9	0.183673	0.000933	BP
nuclear lumen	24	0.0245902	0.000941	CC
cellular response to radiation	19	0.111111	0.000967	BP
nuclear division	0	0	0.000999	BP
thylakoid membrane	5	0.0131234	0.00102	CC
vacuolar membrane	22	0.102326	0.00113	CC
response to starvation	22	0.101382	0.00121	BP
mitochondrial inner membrane	2	0.00784314	0.00121	CC
chemical homeostasis	44	0.0785714	0.00124	BP
organelle	971	0.0487572	0.00124	CC
response to blue light	18	0.1125	0.00125	BP
response to gibberellin	15	0.120968	0.00126	BP
DNA repair	4	0.0118694	0.00127	BP
innate immune response	19	0.106742	0.00134	BP
fatty acid oxidation	8	0.190476	0.00145	BP
nitrogen compound metabolic process	379	0.0533803	0.00149	BP
translation	10	0.0185874	0.00149	BP
oligosaccharide metabolic process	12	0.136364	0.00151	BP
root hair tip	4	0.444444	0.00196	CC

## Sheet: downregulated
GO Term	Gene Number	Ratio	P-value	BP/MF/CC
cell cycle	199	0.296572	3.32e-73	BP
cell cycle process	186	0.313659	1.56e-71	BP
non-membrane-bounded organelle	258	0.151586	9.81e-45	CC
intracellular non-membrane-bounded organelle	258	0.151586	9.81e-45	CC
cellular process	1094	0.0736601	3.42e-44	BP
mitotic cell cycle	91	0.347328	6.45e-38	BP
meiotic cell cycle	97	0.303125	2.71e-36	BP
meiotic cell cycle process	91	0.315972	2.91e-35	BP
mitotic cell cycle process	77	0.37561	4.2e-34	BP
cell division	111	0.238197	2.54e-33	BP
cytosolic ribosome	82	0.278912	9.44e-29	CC
cellular component organization or biogenesis	359	0.0992261	1.13e-26	BP
organic substance biosynthetic process	316	0.101315	1.5e-24	BP
ribosome	87	0.219144	3.49e-24	CC
biosynthetic process	325	0.0976856	8.29e-23	BP
regulation of cell cycle	66	0.268293	1.33e-22	BP
binding	764	0.0740167	1.72e-22	MF
microtubule cytoskeleton	70	0.25	2.06e-22	CC
microtubule-based process	64	0.274678	2.07e-22	BP
cytosol	272	0.102719	1.11e-21	CC
nuclear division	54	0.317647	1.66e-21	BP
cellular component organization	285	0.100105	3.66e-21	BP
cytoskeleton	78	0.210243	7.29e-21	CC
developmental process	481	0.0830599	1.34e-20	BP
organelle fission	58	0.27619	1.57e-20	BP
tissue development	205	0.112948	2.22e-20	BP
anatomical structure development	448	0.0843691	3.43e-20	BP
cytokinesis	52	0.304094	4.56e-20	BP
cellular biosynthetic process	281	0.0978412	1.29e-19	BP
structural molecule activity	87	0.180498	2.21e-19	MF
reproduction	264	0.0997355	2.36e-19	BP
microtubule binding	51	0.296512	2.58e-19	MF
regionalization	58	0.255507	3.59e-19	BP
reproductive process	261	0.0995803	3.97e-19	BP
protein binding	470	0.0820961	4.55e-19	MF
DNA replication	45	0.335821	6.4e-19	BP
cellular metabolic process	659	0.0746404	6.53e-19	BP
microtubule	53	0.276042	7.21e-19	CC
ribosomal subunit	68	0.213836	1.1e-18	CC
tubulin binding	51	0.28022	1.93e-18	MF
supramolecular fiber	54	0.259615	3.35e-18	CC
polymeric cytoskeletal fiber	54	0.259615	3.35e-18	CC
supramolecular polymer	54	0.259615	3.35e-18	CC
organelle organization	186	0.111779	5.23e-18	BP
pattern specification process	64	0.215488	8.36e-18	BP
chromosome	71	0.196676	9.47e-18	CC
cellular macromolecule metabolic process	242	0.099835	1.03e-17	BP
DNA metabolic process	88	0.166667	1.12e-17	BP
cellular anatomical entity	1451	0.0591665	1.85e-17	CC
multicellular organismal process	393	0.0840822	4.17e-17	BP
DNA-templated DNA replication	39	0.33913	1.05e-16	BP
chromosome organization	52	0.242991	1.49e-16	BP
microtubule cytoskeleton organization	47	0.264045	2.92e-16	BP
metabolic process	759	0.070109	6.99e-16	BP
structural constituent of ribosome	64	0.193939	7.08e-16	MF
organic substance metabolic process	700	0.0713776	9.52e-16	BP
cell junction	116	0.130631	1.51e-15	CC
anchoring junction	116	0.130631	1.51e-15	CC
symplast	116	0.130631	1.51e-15	CC
cell-cell junction	116	0.130631	1.51e-15	CC
plasmodesma	116	0.130631	1.51e-15	CC
cellular amide metabolic process	102	0.139154	1.79e-15	BP
regulation of cell cycle process	41	0.284722	2.68e-15	BP
catalytic activity	611	0.0731912	3.55e-15	MF
amide biosynthetic process	90	0.14876	3.67e-15	BP
multicellular organism development	363	0.0832569	5.29e-15	BP
supramolecular complex	60	0.194175	5.46e-15	CC
protein-containing complex	278	0.0898513	7.22e-15	CC
cytoskeleton organization	60	0.192308	7.96e-15	BP
chromosome segregation	37	0.305785	9.52e-15	BP
translation	82	0.152416	1.48e-14	BP
nuclear chromosome segregation	35	0.321101	1.5e-14	BP
peptide biosynthetic process	82	0.151013	2.15e-14	BP
meiotic nuclear division	35	0.3125	2.93e-14	BP
primary metabolic process	596	0.0727628	3.86e-14	BP
cytosolic large ribosomal subunit	38	0.279412	4.57e-14	CC
cytoskeletal protein binding	59	0.18612	4.62e-14	MF
plastid envelope	109	0.126597	6.76e-14	CC
organonitrogen compound biosynthetic process	154	0.107617	9.03e-14	BP
microtubule motor activity	26	0.440678	1.05e-13	MF
cell cycle phase transition	25	0.462963	1.3e-13	BP
cell periphery	305	0.0851717	1.48e-13	CC
chloroplast envelope	85	0.139803	3.28e-13	CC
mitotic cell cycle phase transition	24	0.461538	4.22e-13	BP
DNA recombination	40	0.242424	4.96e-13	BP
thylakoid	79	0.144424	5.31e-13	CC
phragmoplast	27	0.380282	5.92e-13	CC
cytoskeletal motor activity	28	0.358974	6.95e-13	MF
microtubule-based movement	25	0.416667	8.39e-13	BP
peptide metabolic process	85	0.136656	1.09e-12	BP
cellular nitrogen compound biosynthetic process	141	0.107716	1.22e-12	BP
cellular macromolecule biosynthetic process	112	0.118268	1.49e-12	BP
recombinational repair	30	0.309278	2.48e-12	BP
small molecule metabolic process	250	0.0875044	2.91e-12	BP
organelle envelope	137	0.106781	4.41e-12	CC
envelope	137	0.106781	4.41e-12	CC
cell wall organization or biogenesis	112	0.115822	4.48e-12	BP
cellular component biogenesis	180	0.0963082	5.38e-12	BP
chloroplast stroma	93	0.126531	6.32e-12	CC
large ribosomal subunit	40	0.213904	1.45e-11	CC
double-strand break repair via homologous recombination	28	0.307692	1.46e-11	BP
plastid stroma	93	0.123835	1.83e-11	CC
sister chromatid segregation	24	0.358209	3.13e-11	BP
regulation of cell cycle phase transition	25	0.337838	3.44e-11	BP
intracellular anatomical structure	1298	0.060165	3.5e-11	CC
regulation of organelle organization	39	0.210811	3.78e-11	BP
cyclin-dependent protein kinase holoenzyme complex	23	0.370968	4.54e-11	CC
mRNA binding	116	0.109641	4.98e-11	MF
plant-type cell wall	71	0.137864	5.66e-11	CC
macromolecule biosynthetic process	133	0.103502	6e-11	BP
anatomical structure morphogenesis	155	0.0976686	8.61e-11	BP
spindle	26	0.305882	8.63e-11	CC
DNA repair	53	0.15727	2.32e-10	BP
cell wall	71	0.13271	2.54e-10	CC
reproductive shoot system development	70	0.1341	2.65e-10	BP
flower development	67	0.136735	2.69e-10	BP
stomatal complex development	24	0.311688	3.31e-10	BP
cytosolic small ribosomal subunit	26	0.282609	3.64e-10	CC
cellular nitrogen compound metabolic process	265	0.0817901	4.16e-10	BP
double-strand break repair	31	0.233083	4.63e-10	BP
cellular response to DNA damage stimulus	56	0.149333	4.75e-10	BP
external encapsulating structure	72	0.128801	6.21e-10	CC
carboxylic acid biosynthetic process	75	0.125839	6.9e-10	BP
ATP-dependent activity	86	0.118132	7.02e-10	MF
cell cycle DNA replication	17	0.472222	8.37e-10	BP
meristem development	63	0.137255	9.18e-10	BP
small molecule biosynthetic process	99	0.110245	1.16e-09	BP
floral organ development	44	0.162963	2.98e-09	BP
gametophyte development	67	0.128107	3.23e-09	BP
DNA replication initiation	14	0.583333	3.3e-09	BP
anatomical structure arrangement	26	0.247619	3.92e-09	BP
shoot system development	128	0.0980092	3.95e-09	BP
phyllome development	82	0.114846	6.04e-09	BP
negative regulation of cellular process	114	0.100707	7.71e-09	BP
chloroplast thylakoid	59	0.132584	8.12e-09	CC
condensed chromosome	20	0.3125	9.35e-09	CC
serine/threonine protein kinase complex	23	0.264368	1.08e-08	CC
regulation of mitotic cell cycle	23	0.261364	1.3e-08	BP
regulation of cellular component organization	52	0.140541	1.34e-08	BP
regulation of mitotic cell cycle phase transition	18	0.346154	1.39e-08	BP
nucleus	698	0.0658553	1.54e-08	CC
plastid thylakoid	59	0.13082	1.57e-08	CC
oxoacid metabolic process	171	0.0875576	1.66e-08	BP
intracellular organelle	1198	0.060304	1.73e-08	CC
membrane	369	0.0733598	1.79e-08	CC
small ribosomal subunit	28	0.212121	1.86e-08	CC
organic cyclic compound binding	376	0.0730097	1.98e-08	MF
negative regulation of biological process	164	0.0880773	2.04e-08	BP
fatty acid biosynthetic process	28	0.210526	2.15e-08	BP
plant-type cell wall organization or biogenesis	64	0.124272	2.4e-08	BP
photosynthesis	36	0.171429	2.57e-08	BP
heterocyclic compound binding	373	0.0729941	2.62e-08	MF
organelle	1199	0.0602059	2.72e-08	CC
mitotic nuclear division	19	0.306452	2.84e-08	BP
organic acid biosynthetic process	79	0.112216	3.24e-08	BP
structural constituent of chromatin	16	0.372093	3.89e-08	MF
plant organ development	170	0.0862069	4.59e-08	BP
floral whorl development	36	0.166667	4.82e-08	BP
protein kinase complex	23	0.239583	5.13e-08	CC
cytoskeleton-dependent cytokinesis	19	0.292308	5.32e-08	BP
carboxylic acid metabolic process	139	0.0904359	6.91e-08	BP
organic acid metabolic process	177	0.0847701	7.56e-08	BP
monocarboxylic acid biosynthetic process	39	0.154762	7.83e-08	BP
spindle organization	19	0.283582	7.96e-08	BP
plasma membrane	242	0.078648	8.49e-08	CC
shoot system morphogenesis	36	0.162162	8.83e-08	BP
post-embryonic development	189	0.0828584	1.11e-07	BP
cell wall biogenesis	56	0.126126	1.3e-07	BP
adaxial/abaxial pattern specification	16	0.333333	1.35e-07	BP
chloroplast thylakoid membrane	47	0.136232	1.36e-07	CC
microtubule associated complex	19	0.271429	1.42e-07	CC
nuclear DNA replication	10	0.714286	1.52e-07	BP
fatty acid metabolic process	38	0.15261	1.57e-07	BP
negative regulation of cell cycle phase transition	15	0.357143	1.59e-07	BP
apoplast	43	0.140984	1.86e-07	CC
nitrogen compound metabolic process	486	0.0684507	2.4e-07	BP
anatomical structure formation involved in morphogenesis	39	0.149425	2.65e-07	BP
meiosis II	12	0.461538	3.14e-07	BP
meiosis II cell cycle process	12	0.461538	3.14e-07	BP
plastid thylakoid membrane	47	0.133144	3.26e-07	CC
regulation of transferase activity	22	0.22	3.54e-07	BP
meiotic chromosome segregation	17	0.283333	3.84e-07	BP
chromosome organization involved in meiotic cell cycle	16	0.301887	4.13e-07	BP
mRNA processing	1	0.00299401	4.25e-07	BP
protein-DNA complex	17	0.278689	4.67e-07	CC
double-strand break repair via break-induced replication	9	0.75	4.85e-07	BP
regulation of chromosome organization	15	0.319149	5.25e-07	BP
cytokinesis by cell plate formation	18	0.257143	5.91e-07	BP
mitotic sister chromatid segregation	14	0.341463	6.42e-07	BP
cell cycle checkpoint signaling	14	0.341463	6.42e-07	BP
plastid membrane	57	0.117769	7.15e-07	CC
meiosis I	18	0.25	8.38e-07	BP
thylakoid membrane	48	0.125984	9.08e-07	CC
regulation of protein kinase activity	18	0.246575	9.94e-07	BP
plant-type cell wall biogenesis	38	0.140741	1e-06	BP
photosynthetic membrane	48	0.124352	1.14e-06	CC
DNA unwinding involved in DNA replication	10	0.526316	1.22e-06	BP
cellular component assembly	94	0.0958206	1.24e-06	BP
DNA conformation change	14	0.318182	1.29e-06	BP
mRNA metabolic process	5	0.0104822	1.37e-06	BP
kinesin complex	12	0.387097	1.39e-06	CC
regulation of kinase activity	18	0.24	1.39e-06	BP
meiosis I cell cycle process	18	0.24	1.39e-06	BP
lipid biosynthetic process	78	0.10143	1.45e-06	BP
cyclin-dependent protein serine/threonine kinase regulator activity	15	0.288462	1.52e-06	MF
MCM complex	8	0.8	1.53e-06	CC
mitotic DNA replication	8	0.8	1.53e-06	BP
ATP hydrolysis activity	37	0.139623	1.63e-06	MF
negative regulation of cell cycle process	17	0.25	1.68e-06	BP
organonitrogen compound metabolic process	379	0.0699004	1.72e-06	BP
transferase complex, transferring phosphorus-containing groups	35	0.144628	1.75e-06	CC
non-membrane-bounded organelle assembly	26	0.173333	1.78e-06	BP
microtubule cytoskeleton organization involved in mitosis	12	0.375	1.82e-06	BP
preprophase band	11	0.423077	1.92e-06	CC
system development	270	0.0737705	2.09e-06	BP
purine ribonucleoside triphosphate binding	66	0.106452	2.19e-06	MF
ATP binding	56	0.114519	2.21e-06	MF
negative regulation of cell cycle	18	0.230769	2.24e-06	BP
regulation of cyclin-dependent protein kinase activity	15	0.277778	2.26e-06	BP
regulation of cyclin-dependent protein serine/threonine kinase activity	15	0.277778	2.26e-06	BP
nucleic acid binding	267	0.0737773	2.28e-06	MF
adaxial/abaxial axis specification	12	0.363636	2.37e-06	BP
DNA geometric change	12	0.363636	2.37e-06	BP
DNA duplex unwinding	12	0.363636	2.37e-06	BP
kinase regulator activity	20	0.208333	2.46e-06	MF
anchored component of plasma membrane	28	0.16092	2.63e-06	CC
ribonucleoprotein complex	71	0.102601	3.19e-06	CC
regulation of protein phosphorylation	19	0.213483	3.2e-06	BP
nuclear replication fork	10	0.454545	3.41e-06	CC
spindle microtubule	11	0.392857	3.42e-06	CC
reproductive structure development	162	0.0811217	3.57e-06	BP
reproductive system development	162	0.0810405	3.62e-06	BP
gynoecium development	20	0.20202	3.7e-06	BP
developmental process involved in reproduction	179	0.0791685	3.88e-06	BP
specification of axis polarity	12	0.342857	3.9e-06	BP
monocarboxylic acid metabolic process	68	0.103817	3.92e-06	BP
cellular developmental process	120	0.0869565	4.13e-06	BP
sexual reproduction	32	0.147465	4.2e-06	BP
regulation of microtubule cytoskeleton organization	11	0.37931	4.49e-06	BP
spindle assembly	14	0.28	4.53e-06	BP
protein kinase regulator activity	19	0.206522	4.87e-06	MF
regulation of protein serine/threonine kinase activity	15	0.254237	5.69e-06	BP
regulation of microtubule-based process	11	0.366667	5.84e-06	BP
plastid	378	0.0689278	5.84e-06	CC
cytoplasm	911	0.0614088	5.92e-06	CC
cytoplasmic translation	17	0.223684	6.1e-06	BP
regulation of DNA metabolic process	23	0.171642	7.93e-06	BP
regulation of DNA replication	14	0.264151	8e-06	BP
regulation of phosphorylation	19	0.197917	8.3e-06	BP
nuclear chromosome	21	0.181034	9.52e-06	CC
stromule	12	0.307692	9.76e-06	CC
chromatin organization	35	0.132075	1.03e-05	BP
RNA metabolic process	41	0.0295176	1.08e-05	BP
RNA splicing	2	0.00636943	1.1e-05	BP
chloroplast thylakoid membrane protein complex	10	0.384615	1.11e-05	CC
negative regulation of mitotic cell cycle phase transition	10	0.384615	1.11e-05	BP
regulation of biological process	496	0.065975	1.11e-05	BP
chromosome condensation	9	0.45	1.13e-05	BP
DNA packaging complex	12	0.3	1.21e-05	CC
replication fork	12	0.3	1.21e-05	CC
G1/S transition of mitotic cell cycle	7	0.7	1.31e-05	BP
single-stranded DNA helicase activity	7	0.7	1.31e-05	MF
male meiotic nuclear division	10	0.37037	1.45e-05	BP
gamete generation	17	0.207317	1.45e-05	BP
xylem and phloem pattern formation	17	0.207317	1.45e-05	BP
lipid metabolic process	111	0.0862471	1.51e-05	BP
anchored component of membrane	39	0.12381	1.78e-05	CC
mitotic cytokinesis	12	0.285714	1.82e-05	BP
photosynthesis, light reaction	23	0.161972	1.82e-05	BP
hydrolase activity, acting on acid anhydrides, in phosphorus-containing anhydrides	57	0.104205	1.85e-05	MF
axis specification	14	0.241379	1.91e-05	BP
replisome	8	0.5	1.94e-05	CC
nuclear replisome	8	0.5	1.94e-05	CC
cell fate specification	11	0.314286	1.94e-05	BP
abaxial cell fate specification	7	0.636364	2.05e-05	BP
cell cycle G1/S phase transition	7	0.636364	2.05e-05	BP
multicellular organism reproduction	32	0.135593	2.11e-05	BP
post-embryonic plant morphogenesis	30	0.136986	2.16e-05	BP
mitotic spindle organization	10	0.344828	2.4e-05	BP
mitochondrion	185	0.0416854	2.47e-05	CC
mitotic chromosome condensation	6	0.857143	2.57e-05	BP
ribonucleoside triphosphate phosphatase activity	51	0.107368	2.69e-05	MF
plus-end-directed microtubule motor activity	8	0.470588	2.72e-05	MF
polarity specification of adaxial/abaxial axis	9	0.391304	2.74e-05	BP
hydrolase activity, acting on acid anhydrides	57	0.103448	2.84e-05	MF
regulation of cell cycle G2/M phase transition	10	0.333333	3.05e-05	BP
DNA replication origin binding	7	0.583333	3.1e-05	MF
biological regulation	533	0.0648182	3.1e-05	BP
multicellular organismal reproductive process	31	0.134783	3.11e-05	BP
pollen development	43	0.114667	3.17e-05	BP
regulation of cytoskeleton organization	16	0.202532	3.29e-05	BP
organelle assembly	26	0.146067	4.29e-05	BP
RNA splicing, via transesterification reactions	1	0.00398406	4.35e-05	BP
RNA splicing, via transesterification reactions with bulged adenosine as nucleophile	1	0.00398406	4.35e-05	BP
regulation of DNA-templated DNA replication	12	0.255319	4.67e-05	BP
RNA processing	22	0.0253165	4.71e-05	BP
phloem or xylem histogenesis	24	0.147239	4.78e-05	BP
intracellular membrane-bounded organelle	1159	0.0590032	5.16e-05	CC
flavonoid metabolic process	21	0.159091	5.2e-05	BP
chromosome, centromeric region	11	0.275	5.44e-05	CC
epigenetic regulation of gene expression	22	0.152778	5.98e-05	BP
embryo development	72	0.0926641	6.11e-05	BP
RNA binding	130	0.0802469	6.4e-05	MF
negative regulation of chromosome organization	7	0.5	6.52e-05	BP
regulation of nuclear division	12	0.244898	6.59e-05	BP
light-harvesting complex	6	0.666667	6.84e-05	CC
thylakoid light-harvesting complex	6	0.666667	6.84e-05	CC
chloroplast	344	0.0678769	7.45e-05	CC
mitotic spindle	9	0.333333	7.6e-05	CC
regulation of G2/M transition of mitotic cell cycle	9	0.333333	7.6e-05	BP
chromosomal region	12	0.24	7.79e-05	CC
pyrophosphatase activity	54	0.100372	7.98e-05	MF
flavonoid biosynthetic process	16	0.186047	8e-05	BP
single-stranded DNA binding	16	0.186047	8e-05	MF
membrane-bounded organelle	1160	0.0588832	9.18e-05	CC
growth	106	0.0829421	9.29e-05	BP
protein heterodimerization activity	20	0.15625	9.68e-05	MF
chromatin remodeling	24	0.143713	0.0001	BP
leaf development	47	0.104213	0.000101	BP
negative regulation of chromosome separation	6	0.6	0.000105	BP
spindle checkpoint signaling	6	0.6	0.000105	BP
negative regulation of mitotic metaphase/anaphase transition	6	0.6	0.000105	BP
negative regulation of metaphase/anaphase transition of cell cycle	6	0.6	0.000105	BP
spindle assembly checkpoint signaling	6	0.6	0.000105	BP
mitotic spindle checkpoint signaling	6	0.6	0.000105	BP
negative regulation of sister chromatid segregation	6	0.6	0.000105	BP
negative regulation of mitotic sister chromatid segregation	6	0.6	0.000105	BP
negative regulation of chromosome segregation	6	0.6	0.000105	BP
negative regulation of mitotic sister chromatid separation	6	0.6	0.000105	BP
mitotic spindle assembly checkpoint signaling	6	0.6	0.000105	BP
regulation of metaphase/anaphase transition of cell cycle	8	0.363636	0.000116	BP
regulation of mitotic metaphase/anaphase transition	8	0.363636	0.000116	BP
phosphorus metabolic process	148	0.0769231	0.00012	BP
nucleobase-containing small molecule metabolic process	44	0.106024	0.000122	BP
syncytium formation	7	0.4375	0.000125	BP
DNA replication checkpoint signaling	7	0.4375	0.000125	BP
organelle subcompartment	94	0.0843806	0.000125	CC
DNA helicase activity	12	0.226415	0.000126	MF
mRNA splicing, via spliceosome	1	0.00444444	0.000126	BP
macromolecule metabolic process	396	0.0661323	0.000134	BP
wax biosynthetic process	9	0.3	0.000148	BP
regulation of mitotic sister chromatid segregation	6	0.545455	0.000154	BP
plant-type sporogenesis	10	0.263158	0.00016	BP
sexual sporulation	10	0.263158	0.00016	BP
sporulation	10	0.263158	0.00016	BP
embryo sac development	23	0.141104	0.000164	BP
male gamete generation	14	0.191781	0.000166	BP
cellular process involved in reproduction in multicellular organism	14	0.191781	0.000166	BP
wax metabolic process	9	0.290323	0.000183	BP
radial pattern formation	9	0.290323	0.000183	BP
mitotic cell cycle checkpoint signaling	9	0.290323	0.000183	BP
regulation of chromosome separation	8	0.333333	0.000191	BP
regulation of mitotic sister chromatid separation	8	0.333333	0.000191	BP
carpel development	15	0.178571	0.000197	BP
plant epidermis development	60	0.0938967	0.000198	BP
heterocycle metabolic process	207	0.0718002	0.000199	BP
ATP-dependent activity, acting on DNA	20	0.147059	0.0002	MF
oxidoreductase activity	117	0.0795918	0.0002	MF
negative regulation of mitotic cell cycle	11	0.229167	0.000217	BP
regulation of protein modification process	26	0.13	0.000217	BP
isomerase activity	30	0.119522	0.000222	MF
homologous chromosome segregation	9	0.28125	0.000223	BP
glycine metabolic process	7	0.388889	0.000224	BP
condensin complex	5	0.714286	0.000229	CC
DNA replication preinitiation complex	5	0.714286	0.000229	CC
PSII associated light-harvesting complex II	5	0.714286	0.000229	CC
spindle midzone	5	0.714286	0.000229	CC
spindle elongation	5	0.714286	0.000229	BP
regulation of molecular function	37	0.110119	0.000233	BP
monosaccharide metabolic process	19	0.149606	0.000235	BP
regulation of sister chromatid segregation	8	0.32	0.00024	BP
cellular lipid metabolic process	83	0.0851282	0.000247	BP
nuclear lumen	83	0.085041	0.00025	CC
reciprocal meiotic recombination	12	0.206897	0.00026	BP
reciprocal homologous recombination	12	0.206897	0.00026	BP
carbohydrate metabolic process	89	0.0835681	0.000263	BP
carbohydrate derivative metabolic process	87	0.084466	0.000267	BP
cyclin-dependent protein serine/threonine kinase activity	9	0.272727	0.000271	MF
cyclin-dependent protein kinase activity	9	0.272727	0.000271	MF
very long-chain fatty acid metabolic process	10	0.243902	0.000272	BP
DNA polymerase complex	7	0.368421	0.000293	CC
nucleoside phosphate binding	93	0.0824468	0.000297	MF
nucleotide binding	93	0.0824468	0.000297	MF
leaf morphogenesis	16	0.163265	0.000302	BP
defense response to other organism	80	0.0378072	0.000326	BP
fatty acid derivative biosynthetic process	9	0.264706	0.000327	BP
cuticle development	9	0.264706	0.000327	BP
heterochromatin organization	13	0.188406	0.000327	BP
condensed chromosome, centromeric region	8	0.296296	0.000371	CC
microsporogenesis	8	0.296296	0.000371	BP
regulation of chromosome segregation	8	0.296296	0.000371	BP
photosynthesis, light harvesting	10	0.232558	0.000377	BP
DNA binding	140	0.0755532	0.000387	MF
regulation of mitotic nuclear division	9	0.257143	0.000392	BP
response to radiation	152	0.0743276	0.0004	BP
catalytic activity, acting on DNA	30	0.116732	0.000418	MF
THO complex	6	0.428571	0.000422	CC
reductive pentose-phosphate cycle	6	0.428571	0.000422	BP
alpha DNA polymerase:primase complex	4	1	0.000445	CC
photosynthetic electron transport chain	11	0.207547	0.000454	BP
RNA polymerase II CTD heptapeptide repeat kinase activity	8	0.285714	0.000455	MF
regulation of catalytic activity	33	0.11	0.000457	BP
dicarboxylic acid metabolic process	15	0.163043	0.000466	BP
small molecule binding	107	0.0789668	0.000466	MF
very long-chain fatty acid biosynthetic process	7	0.333333	0.000481	BP
homologous recombination	12	0.190476	0.000503	BP
phosphate-containing compound metabolic process	141	0.0750399	0.00051	BP
fatty acid derivative metabolic process	10	0.222222	0.000514	BP
nucleobase-containing compound metabolic process	166	0.0729991	0.000518	BP
organic cyclic compound metabolic process	219	0.0700128	0.000523	BP
protein-DNA complex assembly	14	0.168675	0.000527	BP
ubiquitin protein ligase activity	3	0.0110701	0.000538	MF
regulation of phosphate metabolic process	20	0.137931	0.000558	BP
ubiquitin-like protein ligase activity	3	0.0109489	0.00056	MF
photosynthesis, dark reaction	6	0.4	0.000565	BP
DNA-templated DNA replication maintenance of fidelity	6	0.4	0.000565	BP
mitotic spindle assembly	6	0.4	0.000565	BP
regulation of phosphorus metabolic process	20	0.136986	0.000585	BP
sister chromatid cohesion	10	0.217391	0.000597	BP
stomatal lineage progression	7	0.318182	0.000606	BP
DNA endoreduplication	7	0.318182	0.000606	BP
regulation of cellular process	402	0.0647865	0.000611	BP
sulfur compound biosynthetic process	21	0.13125	0.000612	BP
RNA modification	4	0.013289	0.00065	BP
nucleosome assembly	9	0.236842	0.000655	BP
negative regulation of nuclear division	8	0.266667	0.00067	BP
plant organ formation	19	0.141791	0.000687	BP
monosaccharide biosynthetic process	10	0.212766	0.00069	BP
kinase activity	102	0.0787037	0.000703	MF
developmental growth	87	0.081537	0.000718	BP
trichome differentiation	14	0.162791	0.00072	BP
intrinsic component of plasma membrane	31	0.11032	0.000741	CC
DNA strand elongation involved in DNA replication	6	0.375	0.000743	BP
DNA strand elongation	6	0.375	0.000743	BP
carbon fixation	6	0.375	0.000743	BP
kinetochore	7	0.304348	0.000754	CC
cytokinetic process	5	0.5	0.00076	BP
nuclear cell cycle DNA replication initiation	4	0.8	0.000767	BP
cell cycle DNA replication initiation	4	0.8	0.000767	BP
male meiosis II	4	0.8	0.000767	BP
meiotic sister chromatid cohesion, centromeric	4	0.8	0.000767	BP
mitotic DNA replication initiation	4	0.8	0.000767	BP
cotyledon development	11	0.192982	0.000774	BP
sulfur compound metabolic process	51	0.0928962	0.000787	BP
cell differentiation	97	0.0792484	0.00079	BP
response to stimulus	579	0.0622313	0.000843	BP
embryo development ending in seed dormancy	61	0.0880231	0.000867	BP
plant ovule development	11	0.189655	0.000878	BP
organelle lumen	92	0.0797227	0.0009	CC
membrane-enclosed lumen	92	0.0797227	0.0009	CC
intracellular organelle lumen	92	0.0797227	0.0009	CC
photosynthesis, light harvesting in photosystem I	7	0.291667	0.000931	BP
asymmetric cell division	7	0.291667	0.000931	BP
response to cold	45	0.0951374	0.000948	BP
plant organ morphogenesis	75	0.0832408	0.000967	BP
chromocenter	5	0.454545	0.00106	CC
guard mother cell differentiation	5	0.454545	0.00106	BP
regulation of spindle organization	5	0.454545	0.00106	BP
regulation of mitotic spindle organization	5	0.454545	0.00106	BP
cell fate commitment	14	0.155556	0.00107	BP
plant-type ovary development	11	0.183333	0.00112	BP
negative regulation of mitotic nuclear division	7	0.28	0.00114	BP
generation of precursor metabolites and energy	40	0.0982801	0.00119	BP
plant-type secondary cell wall biogenesis	16	0.141593	0.0012	BP
meiotic sister chromatid cohesion	6	0.333333	0.00122	BP
meiotic sister chromatid segregation	6	0.333333	0.00122	BP
serine family amino acid catabolic process	6	0.333333	0.00122	BP
regulation of cytokinesis	4	0.666667	0.00123	BP
centromeric sister chromatid cohesion	4	0.666667	0.00123	BP
response to fungus	32	0.0321608	0.00128	BP
DNA integrity checkpoint signaling	7	0.269231	0.00138	BP
cytoplasmic microtubule	11	0.177419	0.00141	CC
phosphatidylcholine biosynthetic process	5	0.416667	0.00143	BP
cellular aromatic compound metabolic process	208	0.0689655	0.00143	BP
nuclear microtubule	6	0.315789	0.00154	CC
protein metabolic process	255	0.0671053	0.00161	BP
homologous chromosome pairing at meiosis	7	0.259259	0.00166	BP
protein-DNA complex subunit organization	14	0.147368	0.00169	BP
nucleoside phosphate metabolic process	33	0.101852	0.00169	BP
vacuole	84	0.0798479	0.00172	CC
nucleolus	46	0.0916335	0.00182	CC
kinetochore microtubule	4	0.571429	0.00185	CC
glycine decarboxylation via glycine cleavage system	4	0.571429	0.00185	BP
negative regulation of stomatal complex development	4	0.571429	0.00185	BP
response to other organism	102	0.0412788	0.00188	BP
response to external biotic stimulus	102	0.0412788	0.00188	BP
cellular response to aldehyde	5	0.384615	0.0019	BP
post-embryonic plant organ morphogenesis	17	0.133858	0.0019	BP
carbohydrate biosynthetic process	35	0.0983146	0.00194	BP
biological process involved in interspecies interaction between organisms	103	0.0414154	0.00195	BP
negative regulation of cellular component organization	10	0.181818	0.00196	BP
nucleotide metabolic process	32	0.102236	0.0021	BP
transferase complex	62	0.0838972	0.00219	CC
heterochromatin formation	11	0.166667	0.0022	BP
meristem structural organization	11	0.166667	0.0022	BP
nucleosome organization	9	0.191489	0.00239	BP
hexose metabolic process	13	0.147727	0.00239	BP
regulation of microtubule polymerization or depolymerization	5	0.357143	0.00247	BP
cortical microtubule cytoskeleton	10	0.175439	0.00247	CC
regulation of phragmoplast microtubule organization	3	1	0.00255	BP
negative regulation of gene expression, epigenetic	12	0.153846	0.00256	BP
response to biotic stimulus	103	0.0416498	0.00258	BP
spliceosomal complex	1	0.00591716	0.00263	CC
cellularization	4	0.5	0.00265	BP
glycine catabolic process	4	0.5	0.00265	BP
carbon utilization	4	0.5	0.00265	BP
organelle membrane	115	0.0740979	0.00265	CC
glycosyl compound biosynthetic process	9	0.1875	0.0027	BP
cellular polysaccharide metabolic process	33	0.0996979	0.00277	BP
plant epidermis morphogenesis	14	0.138614	0.00281	BP
regulation of meristem structural organization	6	0.272727	0.00286	BP
response to light stimulus	143	0.0713929	0.00295	BP
cell wall organization	31	0.100324	0.00298	BP
chromatin	22	0.113402	0.00303	CC
catalytic complex	102	0.0753323	0.00304	CC
cortical cytoskeleton	10	0.166667	0.00343	CC
plastoglobule	10	0.166667	0.00343	CC
cell plate	8	0.195122	0.00371	CC
plant-type vacuole	65	0.0815558	0.00394	CC
site of double-strand break	4	0.4	0.00494	CC
site of DNA damage	4	0.4	0.00494	CC
photosystem	10	0.15625	0.00514	CC
endomembrane system	165	0.0690377	0.00523	CC
cortical microtubule	9	0.166667	0.00538	CC
intrinsic component of membrane	68	0.0787949	0.00563	CC
