# Supplementary material for: Transcriptome Analysis Reveals Key Genes and Pathways Associated with the Regulation of Flowering Time in Cabbage (Brassica oleracea L. var. capitata)
Source: Plants (Basel). 2023 Sep 28;12(19):3413. doi: 10.3390/plants12193413 (PMC10574337; doi:10.3390/plants12193413)
Supplement: Supplementary file 1 [file plants-12-03413-s001.zip › Table S3.xlsx]

## Sheet: upregulated DEGs
KEGG Pathway	Gene Number	Ratio	PValue
Plant hormone signal transduction	36	0.0282132	2.3587e-06
MAPK signaling pathway - plant	19	0.0148903	0.000304334
Plant-pathogen interaction	21	0.0164577	0.00478168
alpha-Linolenic acid metabolism	8	0.00626959	0.00642876
Sphingolipid metabolism	6	0.00470219	0.0241127
ABC transporters	9	0.00705329	0.0249021
Phenylpropanoid biosynthesis	12	0.00940439	0.0716976
Other glycan degradation	4	0.0031348	0.0743662
Peroxisome	9	0.00705329	0.0892215
Biosynthesis of secondary metabolites	78	0.0611285	0.0919741

## Sheet: downregulated DEGs
KEGG Pathway	Gene Number	Ratio	PValue
Ribosome	76	0.0493827	1.63408e-14
DNA replication	16	0.0103964	1.02181e-06
Glyoxylate and dicarboxylate metabolism	17	0.0110461	0.000638385
Homologous recombination	14	0.00909682	0.00119089
Metabolic pathways	233	0.151397	0.002118
Carbon fixation in photosynthetic organisms	14	0.00909682	0.00442838
Photosynthesis - antenna proteins	7	0.00454841	0.00807743
Fatty acid elongation	9	0.00584795	0.00881611
Nucleotide metabolism	15	0.00974659	0.00982211
Photosynthesis	14	0.00909682	0.0113478
Fatty acid metabolism	13	0.00844704	0.0130809
Mismatch repair	8	0.00519818	0.0152518
Biosynthesis of nucleotide sugars	16	0.0103964	0.0195011
Nitrogen metabolism	9	0.00584795	0.0251687
Fatty acid biosynthesis	9	0.00584795	0.0251687
Carbon metabolism	33	0.0214425	0.0333521
Pyrimidine metabolism	11	0.0071475	0.0401501
Biosynthesis of unsaturated fatty acids	6	0.00389864	0.0541942
Purine metabolism	13	0.00844704	0.059917
Glucosinolate biosynthesis	6	0.00389864	0.0626458
