# Supplementary material for: Transcriptome Analysis Reveals Key Genes and Pathways Associated with the Regulation of Flowering Time in Cabbage (Brassica oleracea L. var. capitata)
Source: Plants (Basel). 2023 Sep 28;12(19):3413. doi: 10.3390/plants12193413 (PMC10574337; doi:10.3390/plants12193413)
Supplement: Supplementary file 1 [file plants-12-03413-s001.zip › Table S4.xlsx]

## Sheet: Sheet1
Table S2. Cabbage(Brassica oleracea L. var. capitata) homologs of flowering-time genes.
Bo ID	At ID	Gene Name	Pathway
Bo3g001090	AT1G01060	LHY	C/L/P
Bo5g002760	AT1G01060	LHY	C/L/P
Bo4g014750	AT1G02400	GA2ox6	G/M
Bo5g003140	AT1G02400	GA2ox6	G/M
Bo5g004560	AT1G04400	CRY2	C/L/P
Bo8g002920	AT1G04400	CRY2	C/L/P
Bo5g009380	AT1G08970	NFYC9	C/L/P
Bo8g058100	AT1G08970	NFYC9	C/L/P
Bo5g009910	AT1G09530	PIF3	C/L/P
Bo8g111120	AT1G09530	PIF3	C/L/P
Bo2g108710	AT1G09570	PHYA	C/L/P
Bo2g108720	AT1G09570	PHYA	C/L/P
Bo5g009990	AT1G09570	PHYA	C/L/P
Bo8g111060	AT1G09570	PHYA	C/L/P
Bo5g015210	AT1G13260	RAV1	C/L/P
Bo8g107500	AT1G13260	RAV1	C/L/P
Bo5g005250	AT1G14400	UBC1	V
Bo5g019560	AT1G14400	UBC1	V
Bo6g110410	AT1G14400	UBC1	V
Bo8g066020	AT1G14400	UBC1	V
Bo4g076790	AT1G14920	GAI	G/M
Bo8g067440	AT1G17760	Cstf77	V
Bo9g142300	AT1G17760	Cstf77	V
Bo5g038860	AT1G22770	GI	C/L/P
Bo3g141410	AT1G24260	SEP3	D/M
Bo5g051910	AT1G24260	SEP3	D/M
Bo7g050020	AT1G24260	SEP3	D/M
Bo7g050030	AT1G24260	SEP3	D/M
Bo3g138570	AT1G25540	PFT1	C/L/P
Bo5g043140	AT1G25540	PFT1	C/L/P
Bo3g138550	AT1G25560	TEM1	C/L/P
Bo5g043120	AT1G25560	TEM1	C/L/P
Bo5g045160	AT1G26830	CUL3	C/L/P
Bo8g076450	AT1G26830	CUL3	C/L/P
Bo3g147550	AT1G30040	GA2ox2	G/M
Bo5g062250	AT1G30040	GA2ox2	G/M
Bo7g044790	AT1G30040	GA2ox2	G/M
Bo5g048560	AT1G32100	PRR1	C/L/P
Bo5g090610	AT1G32100	PRR1	C/L/P
Bo3g184890	AT1G55250	HUB2	V
Bo1g094620	AT1G61040	VIP5	V
Bo4g086470	AT1G61040	VIP5	V
Bo2g061320	AT1G68840	TEM2	C/L/P
Bo2g062650	AT1G69120	AP1	D/M
Bo6g095760	AT1G69120	AP1	D/M
Bo6g108600	AT1G69120	AP1	D/M
Bo6g095390	AT1G69570	CDF5	C/L/P
Bo6g109100	AT1G69570	CDF5	C/L/P
Bo2g074020	AT1G71800	Cstf64	V
Bo6g093030	AT1G71800	Cstf64	V
Bo6g120790	AT1G76710	SDG26	V
Bo6g121240	AT1G77300	EFS	A
Bo2g093480	AT1G78580	TPS1	Age
Bo6g122130	AT1G78580	TPS1	Age
Bo6g080900	AT1G79640	GA2/KS	G/M
Bo6g124030	AT1G79640	GA2/KS	G/M
Bo9g183540	AT1G79730	ELF7	C/L/P
Bo4g076790	AT2G01570	RGA1	G/M
Bo7g078550	AT2G01570	RGA1	G/M
Bo9g070200	AT2G01570	RGA1	G/M
Bo9g084500	AT2G01570	RGA1	G/M
Bo7g026630	AT2G06005	FIP1	V
Bo3g086870	AT2G06210	ELF8	C/L/P
Bo3g068620	AT2G18790	PHYB	C/L/P
Bo5g123510	AT2G18790	PHYB	C/L/P
Bo6g043680	AT2G18915	FKF1	C/L/P
Bo7g008400	AT2G18915	FKF1	C/L/P
Bo7g008410	AT2G18915	FKF1	C/L/P
Bo3g109350	AT2G19520	FVE1	A
Bo7g005750	AT2G19520	FVE1	A
Bo8g102680	AT2G19520	FVE1	A
Bo9g027720	AT2G19520	FVE1	A
Bo5g034490	AT2G19540	FVE	A
Bo7g005690	AT2G19540	FVE	A
Bo7g065180	AT2G19540	FVE	A
Bo8g049930	AT2G19540	FVE	A
Bo8g102660	AT2G19540	FVE	A
Bo9g027730	AT2G19540	FVE	A
Bo4g145680	AT2G21070	FIO1	C/L/P
Bo4g147050	AT2G21660	GRP7	A
Bo8g101580	AT2G21660	GRP7	A
Bo4g149800	AT2G22540	SVP	V
Bo8g101000	AT2G22540	SVP	V
Bo4g151570	AT2G23380	CLF	V
Bo4g156090	AT2G24790	COL3	C/L/P
Bo3g041950	AT2G24820	TIC55	C/L/P
Bo4g159930	AT2G25930	ELF3	C/L/P
Bo8g098940	AT2G25930	ELF3	C/L/P
Bo2g097480	AT2G28550	TOE1	C/L/P
Bo3g040110	AT2G28550	TOE1	C/L/P
Bo4g070350	AT2G28550	TOE1	C/L/P
Bo4g176210	AT2G31650	ATX1	D/M
Bo3g026990	AT2G32950	COP1	C/L/P
Bo4g045420	AT2G32950	COP1	C/L/P
Bo4g151270	AT2G32950	COP1	C/L/P
Bo4g179540	AT2G32950	COP1	C/L/P
Bo4g179550	AT2G32950	COP1	C/L/P
Bo3g027460	AT2G33810	SPL3	D/M
Bo4g042390	AT2G33810	SPL3	D/M
Bo3g027480	AT2G33835	FES	V
Bo4g042370	AT2G33835	FES	V
Bo4g039370	AT2G34720	NFYA4	C/L/P
Bo3g032940	AT2G38880	NF-YB1	C/L/P
Bo4g026870	AT2G38880	NF-YB1	C/L/P
Bo3g034670	AT2G40080	ELF4	C/L/P
Bo4g025580	AT2G40080	ELF4	C/L/P
Bo4g025620	AT2G40080	ELF4	C/L/P
Bo4g188760	AT2G40080	ELF4	C/L/P
Bo4g015800	AT2G42200	SPL9	D/M
Bo4g191350	AT2G42200	SPL9	D/M
Bo3g036300	AT2G43010	PIF4	C/L/P
Bo4g192880	AT2G43010	PIF4	C/L/P
Bo4g019780	AT2G43410	FPA1	G/M
Bo8g094300	AT2G43410	FPA1	G/M
Bo4g024230	AT2G44950	HUB1	V
Bo4g195290	AT2G44950	HUB1	V
Bo3g038850	AT2G45640	SAP18	D/M
Bo4g024830	AT2G45640	SAP18	D/M
Bo3g038880	AT2G45660	SOC1	I
Bo4g024850	AT2G45660	SOC1	I
Bo4g195720	AT2G45660	SOC1	I
Bo3g039180	AT2G46340	SPA1	C/L/P
Bo4g009360	AT2G46340	SPA1	C/L/P
Bo4g006970	AT2G46790	PRR9	C/L/P
Bo4g197350	AT2G46790	PRR9	C/L/P
Bo7g044880	AT2G46790	PRR9	C/L/P
Bo4g006930	AT2G46830	CCA1	C/L/P
Bo4g005730	AT2G47070	SPL1	D/M
Bo4g002370	AT2G47700	RFI2	C/L/P
Bo5g030520	AT2G47700	RFI2	C/L/P
Bo8g098330	AT2G47700	RFI2	C/L/P
Bo1g158920	AT3G01460	MBD9	A
Bo5g155130	AT3G01460	MBD9	A
Bo1g157450	AT3G02310	SEP2	D/M
Bo5g152700	AT3G02310	SEP2	D/M
Bo9g163790	AT3G02310	SEP2	D/M
Bo1g157390	AT3G02380	COL2	C/L/P
Bo3g055600	AT3G02380	COL2	C/L/P
Bo3g058470	AT3G04610	FLK	A
Bo5g148050	AT3G04610	FLK	A
Bo3g058680	AT3G04910	WNK1	V
Bo5g146900	AT3G04910	WNK1	V
Bo5g146670	AT3G05120	GID1A	G/M
Bo1g147240	AT3G07650	COL9	C/L/P
Bo3g061400	AT3G07650	COL9	C/L/P
Bo5g141290	AT3G07650	COL9	C/L/P
Bo3g062600	AT3G10390	FLD	A
Bo1g141040	AT3G11440	MYB65	G/M
Bo5g136570	AT3G11440	MYB65	G/M
Bo3g064270	AT3G11540	SPY	G/M
Bo5g136400	AT3G11540	SPY	G/M
Bo1g129690	AT3G15270	SPL5	D/M
Bo5g127310	AT3G15270	SPL5	D/M
Bo6g029290	AT3G15270	SPL5	D/M
Bo6g031220	AT3G15270	SPL5	D/M
Bo9g137270	AT3G15270	SPL5	D/M
Bo1g128580	AT3G15354	SPA3	C/L/P
Bo5g127250	AT3G15354	SPA3	C/L/P
Bo5g122850	AT3G17590	CHE	C/L/P
Bo1g115980	AT3G18990	VRN1	V
Bo3g071890	AT3G18990	VRN1	V
Bo5g116790	AT3G18990	VRN1	V
Bo3g076070	AT3G20550	DDL	D/M
Bo1g108680	AT3G20740	FIE	A
Bo5g107300	AT3G20740	FIE	A
Bo6g034450	AT3G20740	FIE	A
Bo7g108230	AT3G20740	FIE	A
Bo1g105170	AT3G22380	TIC	C/L/P
Bo3g080160	AT3G22380	TIC	C/L/P
Bo5g098070	AT3G22380	TIC	C/L/P
Bo7g033100	AT3G24440	VRN5	V
Bo7g033120	AT3G24440	VRN5	V
Bo1g070860	AT3G46640	LUX/PCL1	C/L/P
Bo3g132770	AT3G46640	LUX/PCL1	C/L/P
Bo3g134590	AT3G47500	CDF3	C/L/P
Bo8g076910	AT3G48430	REF6	C/L/P
Bo3g109440	AT3G49600	UBP26	V
Bo8g077900	AT3G49600	UBP26	V
Bo6g068410	AT3G54990	SMZ	C/L/P
Bo8g087280	AT3G54990	SMZ	C/L/P
Bo1g007520	AT3G57230	AGL16	A
Bo7g116760	AT3G57230	AGL16	A
Bo4g111230	AT3G57390	AGL18	C/L/P
Bo6g031170	AT3G57390	AGL18	C/L/P
Bo6g072840	AT3G57390	AGL18	C/L/P
Bo7g003640	AT3G57390	AGL18	C/L/P
Bo7g003650	AT3G57390	AGL18	C/L/P
Bo7g003660	AT3G57390	AGL18	C/L/P
Bo8g091790	AT3G57390	AGL18	C/L/P
Bo6g076870	AT3G60250	CKB3	C/L/P
Bo8g095040	AT3G60250	CKB3	C/L/P
Bo4g098320	AT3G63010	GID1B	G/M
Bo6g079770	AT3G63010	GID1B	G/M
Bo8g098320	AT3G63010	GID1B	G/M
Bo9g098970	AT4G00650	FRI	V
Bo9g004450	AT4G02020	SDG10	V
Bo2g100790	AT4G02560	LD	A
Bo2g094760	AT4G02570	CUL1	C/L/P
Bo2g094770	AT4G02570	CUL1	C/L/P
Bo2g100770	AT4G02570	CUL1	C/L/P
Bo2g161040	AT4G02570	CUL1	C/L/P
Bo3g169230	AT4G02570	CUL1	C/L/P
Bo5g003530	AT4G02570	CUL1	C/L/P
Bo6g010890	AT4G02570	CUL1	C/L/P
Bo6g064270	AT4G02570	CUL1	C/L/P
Bo8g117230	AT4G02570	CUL1	C/L/P
Bo9g005920	AT4G02570	CUL1	C/L/P
Bo9g084330	AT4G08920	CRY1	C/L/P
Bo9g091030	AT4G11110	SPA2	C/L/P
Bo9g093920	AT4G11880	AGL14	D/M
Bo1g124900	AT4G14540	NFYB3	C/L/P
Bo3g068130	AT4G14540	NFYB3	C/L/P
Bo5g126550	AT4G14540	NFYB3	C/L/P
Bo4g136010	AT4G15880	ESD4	V
Bo7g104070	AT4G15880	ESD4	V
Bo8g042150	AT4G15880	ESD4	V
Bo1g054910	AT4G16280	FCA	A
Bo4g033440	AT4G16845	VRN2	V
Bo4g036270	AT4G16845	VRN2	V
Bo5g078770	AT4G16845	VRN2	V
Bo8g045980	AT4G16845	VRN2	V
Bo1g052990	AT4G17060	FIP2	V
Bo1g019220	AT4G18130	PHYE	C/L/P
Bo1g022410	AT4G20400	JMJ14	C/L/P
Bo1g031900	AT4G22950	AGL19	V
Bo3g165710	AT4G22950	AGL19	V
Bo7g108360	AT4G22950	AGL19	V
Bo7g108370	AT4G22950	AGL19	V
Bo1g037700	AT4G24210	SLY1	G/M
Bo1g039080	AT4G24540	AGL24	C/L/P
Bo7g109590	AT4G24540	AGL24	C/L/P
Bo1g042950	AT4G26150	CGA1	C/L/P
Bo7g110740	AT4G26150	CGA1	C/L/P
Bo1g011580	AT4G31120	SKB1	A
Bo3g175190	AT4G31120	SKB1	A
Bo7g107000	AT4G31120	SKB1	A
Bo7g114970	AT4G31120	SKB1	A
Bo1g008560	AT4G32980	ATH1	D/M
Bo1g008580	AT4G32980	ATH1	D/M
Bo1g008750	AT4G32980	ATH1	D/M
Bo7g115960	AT4G32980	ATH1	D/M
Bo1g007200	AT4G34530	CIB1	C/L/P
Bo3g168800	AT4G34530	CIB1	C/L/P
Bo1g006110	AT4G35900	FD	C/L/P
Bo3g156810	AT4G35900	FD	C/L/P
Bo7g117660	AT4G35900	FD	C/L/P
Bo1g002530	AT4G39400	BRI1	A
Bo3g149940	AT4G39400	BRI1	A
Bo7g119220	AT4G39400	BRI1	A
Bo9g181310	AT5G04240	ELF6	C/L/P
Bo2g007530	AT5G07200	GA20ox3	G/M
Bo3g004240	AT5G07200	GA20ox3	G/M
Bo3g107890	AT5G07200	GA20ox3	G/M
Bo4g119630	AT5G07200	GA20ox3	G/M
Bo9g175240	AT5G07200	GA20ox3	G/M
Bo3g005470	AT5G10140	FLC1	V
Bo3g024250	AT5G10140	FLC1	V
Bo9g173370	AT5G10140	FLC1	V
Bo9g173400	AT5G10140	FLC1	V
Bo2g010440	AT5G11530	EMF1	V
Bo3g007090	AT5G11530	EMF1	V
Bo7g095720	AT5G11530	EMF1	V
Bo2g010950	AT5G12840	NFYA1	C/L/P
Bo3g008860	AT5G12840	NFYA1	C/L/P
Bo9g169310	AT5G12840	NFYA1	C/L/P
Bo2g011320	AT5G13480	FY	A
Bo3g009200	AT5G13480	FY	A
Bo3g061740	AT5G13480	FY	A
Bo9g163730	AT5G15840	CO	C/L/P
Bo2g012810	AT5G15850	COL1	C/L/P
Bo9g163650	AT5G15850	COL1	C/L/P
Bo9g163720	AT5G15850	COL1	C/L/P
Bo9g163220	AT5G16320	FRL1	V
Bo9g163250	AT5G16320	FRL1	V
Bo2g013840	AT5G17690	TFL2/LHP1	C/L/P
Bo3g012730	AT5G17690	TFL2/LHP1	C/L/P
Bo5g093120	AT5G17690	TFL2/LHP1	C/L/P
Bo9g159960	AT5G17690	TFL2/LHP1	C/L/P
Bo2g161050	AT5G23040	CDF1	C/L/P
Bo7g097980	AT5G23040	CDF1	C/L/P
Bo2g161030	AT5G23150	HUA2	V
Bo7g097870	AT5G23150	HUA2	V
Bo7g096790	AT5G24470	PRR5	C/L/P
Bo9g012630	AT5G24470	PRR5	C/L/P
Bo7g093470	AT5G27320	GID1C	G/M
Bo6g056310	AT5G35840	PHYC	C/L/P
Bo6g057640	AT5G37260	CIR1	C/L/P
Bo1g059040	AT5G39660	CDF2	C/L/P
Bo6g062110	AT5G39660	CDF2	C/L/P
Bo2g129860	AT5G46210	CUL4	C/L/P
Bo7g074140	AT5G46210	CUL4	C/L/P
Bo9g063040	AT5G46210	CUL4	C/L/P
Bo2g133530	AT5G47640	NFYB2	C/L/P
Bo7g077790	AT5G47640	NFYB2	C/L/P
Bo2g050550	AT5G51230	EMF2	V
Bo4g033450	AT5G51230	EMF2	V
Bo2g033970	AT5G56860	GNC	G/M
Bo3g019610	AT5G56860	GNC	G/M
Bo9g127360	AT5G56860	GNC	G/M
Bo2g032410	AT5G57380	VIN3	V
Bo3g019340	AT5G57380	VIN3	V
Bo2g030190	AT5G57660	COL5	C/L/P
Bo9g133400	AT5G57660	COL5	C/L/P
Bo9g141080	AT5G60100	PRR3	C/L/P
Bo1g102330	AT5G60120	TOE2	C/L/P
Bo2g025090	AT5G60120	TOE2	C/L/P
Bo9g141100	AT5G60120	TOE2	C/L/P
Bo2g161210	AT5G60910	FUL	D/M
Bo7g098190	AT5G60910	FUL	D/M
Bo9g014400	AT5G60910	FUL	D/M
Bo2g161350	AT5G61150	VIP4	V
Bo9g014490	AT5G61150	VIP4	V
Bo7g098570	AT5G61380	PRR1/TOC1	C/L/P
Bo9g014570	AT5G61380	PRR1/TOC1	C/L/P
Bo2g161690	AT5G61850	LFY	I
Bo3g109270	AT5G61850	LFY	I
Bo3g100540	AT5G65050	AGL31/MAF2	V
Bo2g166500	AT5G65060	MAF3	V
Bo7g064000	AT5G67180	TOE3	C/L/P
Bo2g164130	AT5G62430	CDF1	C/L/P
Bo3g107650	AT5G62430	CDF1	C/L/P
