# Supplementary material for: Transcriptome Analysis Reveals Key Genes and Pathways Associated with the Regulation of Flowering Time in Cabbage (Brassica oleracea L. var. capitata)
Source: Plants (Basel). 2023 Sep 28;12(19):3413. doi: 10.3390/plants12193413 (PMC10574337; doi:10.3390/plants12193413)
Supplement: Supplementary file 1 [file plants-12-03413-s001.zip › Table S5.xlsx]

## Sheet: Sheet1
Bo ID	Tair ID	Gene name	Pathway	Regulation	Flowering time Enhancer/Repressor
Bo7g108370	AT4G22950	AGL19	V	up	Enhancer
Bo7g108360	AT4G22950	AGL19	V	up	Enhancer
Bo1g007200	AT4G34530	CIB1	C/L/P	up	Enhancer
Bo7g093470	AT5G27320	GID1C	G/M	up	Enhancer
Bo7g098570	AT5G61380	PRR1/TOC1	C/L/P	up	Enhancer
Bo4g197350	AT2G46790	PRR9	C/L/P	up	Enhancer
Bo3g132770	AT3G46640	LUX/PCL1	C/L/P	up	Enhancer
Bo3g138550	AT1G25560	TEM1	C/L/P	up	Repressor
Bo3g036300	AT2G43010	PIF4	C/L/P	up	Enhancer
Bo4g145680	AT2G21070	FIO1	C/L/P	up	Repressor
Bo9g093920	AT4G11880	AGL14	D/M	up	Enhancer
Bo9g027720	AT2G19520	FVE	A	down	Enhancer
Bo4g191350	AT2G42200	SPL9	D/M	down	Enhancer
Bo9g141080	AT5G60100	PRR3	C/L/P	down	Enhancer
Bo3g001090	AT1G01060	LHY	C/L/P	down	Enhancer
Bo6g122130	AT1G78580	TPS1	Age	down	Enhancer
Bo7g115960	AT4G32980	ATH1	D/M	down	Repressor
Bo4g151570	AT2G23380	CLF	V	down	Enhancer
Bo7g098190	AT5G60910	FUL	D/M	down	Enhancer
Bo4g176210	AT2G31650	ATX1	D/M	down	Repressor
Bo1g157450	AT3G02310	SEP2	D/M	down	Enhancer
Bo5g152700	AT3G02310	SEP2	D/M	down	Enhancer
Bo2g093480	AT1G78580	TPS1	Age	down	Enhancer
Bo1g008560	AT4G32980	ATH1	D/M	down	Repressor
Bo1g042950	AT4G26150	CGA1	C/L/P	down	Repressor
