# Supplementary material for: Transcriptome Analysis Reveals Key Genes and Pathways Associated with the Regulation of Flowering Time in Cabbage (Brassica oleracea L. var. capitata)
Source: Plants (Basel). 2023 Sep 28;12(19):3413. doi: 10.3390/plants12193413 (PMC10574337; doi:10.3390/plants12193413)
Supplement: Supplementary file 1 [file plants-12-03413-s001.zip › Table S6.xlsx]

## Sheet: Sheet1
Primer name	Forward Primer(5'-3')	Reverse Primer(5'-3')
Bo7g108370	ACGGGTCAAAGAAACTGGGA	CCTCGCTCCAACTGATTCTC
Bo7g108360	CGCGGAATGAGAGCAATAGT	TGGATTGTCTTGGCTCAGGA
Bo1g007200	TGGTGAATTCCGGTTACCCT	TGCACATCAGAGTCCCACAT
Bo7g093470	TGGACTGCTCTGAAATGGGT	TTCTCTCCGTCCCTCCAAAC
Bo7g098570	TCTGAATGGCATGACAGGGT	CATAGGAGGCATCTGACCGT
Bo4g197350	GCAGCAGAACGTTGAAGACA	CCGTTTGTCTATCCCACCGA
Bo3g132770	GTGGATCTCTCAACGGCAAC	CCTTCGACGTTCATCAGCTG
Bo3g138550	GAAGGTGGGGAGCTCAGATT	CGACTTGAAGTTCGTGACGG
Bo3g036300	CTCCTCTGGTTGCAGCTTTG	TGAACTTCAGCTGCTCGACT
Bo4g145680	TGGCCTCTCTCTACCCTTCT	TCAGGAATCCACCAGCTGAG
Bo9g093920	TGCCGAAGTTGCCCTAGTTA	CTTGCTGCGTGTTATCCTCC
Bo9g027720	ACTGGTGAAGGTGGCGATAA	CGCCTTTTCAACCTTCGTGA
Bo4g191350	TCAACAGTGCAGCAGGTTTC	ACAACACTGAGAGAGACGCA
Bo9g141080	CGAAGTTACTGCTGTTCCGG	AACAGACCGGTTCCAGAGTT
Bo3g001090	ACTCCAGTCCCATTACCAGC	AACTTCCTCCTTGTCACCGT
Bo6g122130	CTTGGGCTTGAAGGAACACC	TCACCTTTCTGCCAGCAAAC
Bo7g115960	GAAACTGAGTCAAGGGCTGC	TGGAAGGCTGATACAACCGT
Bo4g151570	TTCCTTGCGCCCAATCAAAA	TTCCTCGTCAATTGCCTCCT
Bo7g098190	GCAAGATCACAACAATGCGC	CTACCCACGAAGCCATCTCT
Bo4g176210	CAAGATTTTGCGCCTGGAGA	CAAATGAGATGGCGCGAGAA
Bo1g157450	CTTGAAGCCAATCGTGCCTT	TCTGAGCACACTGGATGGTT
Bo5g152700	ACCTGCCAAAGAACTCGAGA	CGTCTTGATGCAGCGAACTT
Bo2g093480	TGGAAGTTCGTGCTGTAGGT	CACATCTTCGTCCCCTCCAT
Bo1g008560	CTCGGTTCTACGGACTTGGA	TCATCGGCTTCCACAGTCTT
Bo1g042950	ACGATGATCACCACCACTGA	GACCTCTCGGACCACTTCTC
